# Supplementary material for: The origins and genomic diversity of American Civil War Era smallpox vaccine strains
Source: PubMed Central journal article supplement (PMC7370420; doi:10.1186/s13059-020-02079-z), 2020-07-20

**A**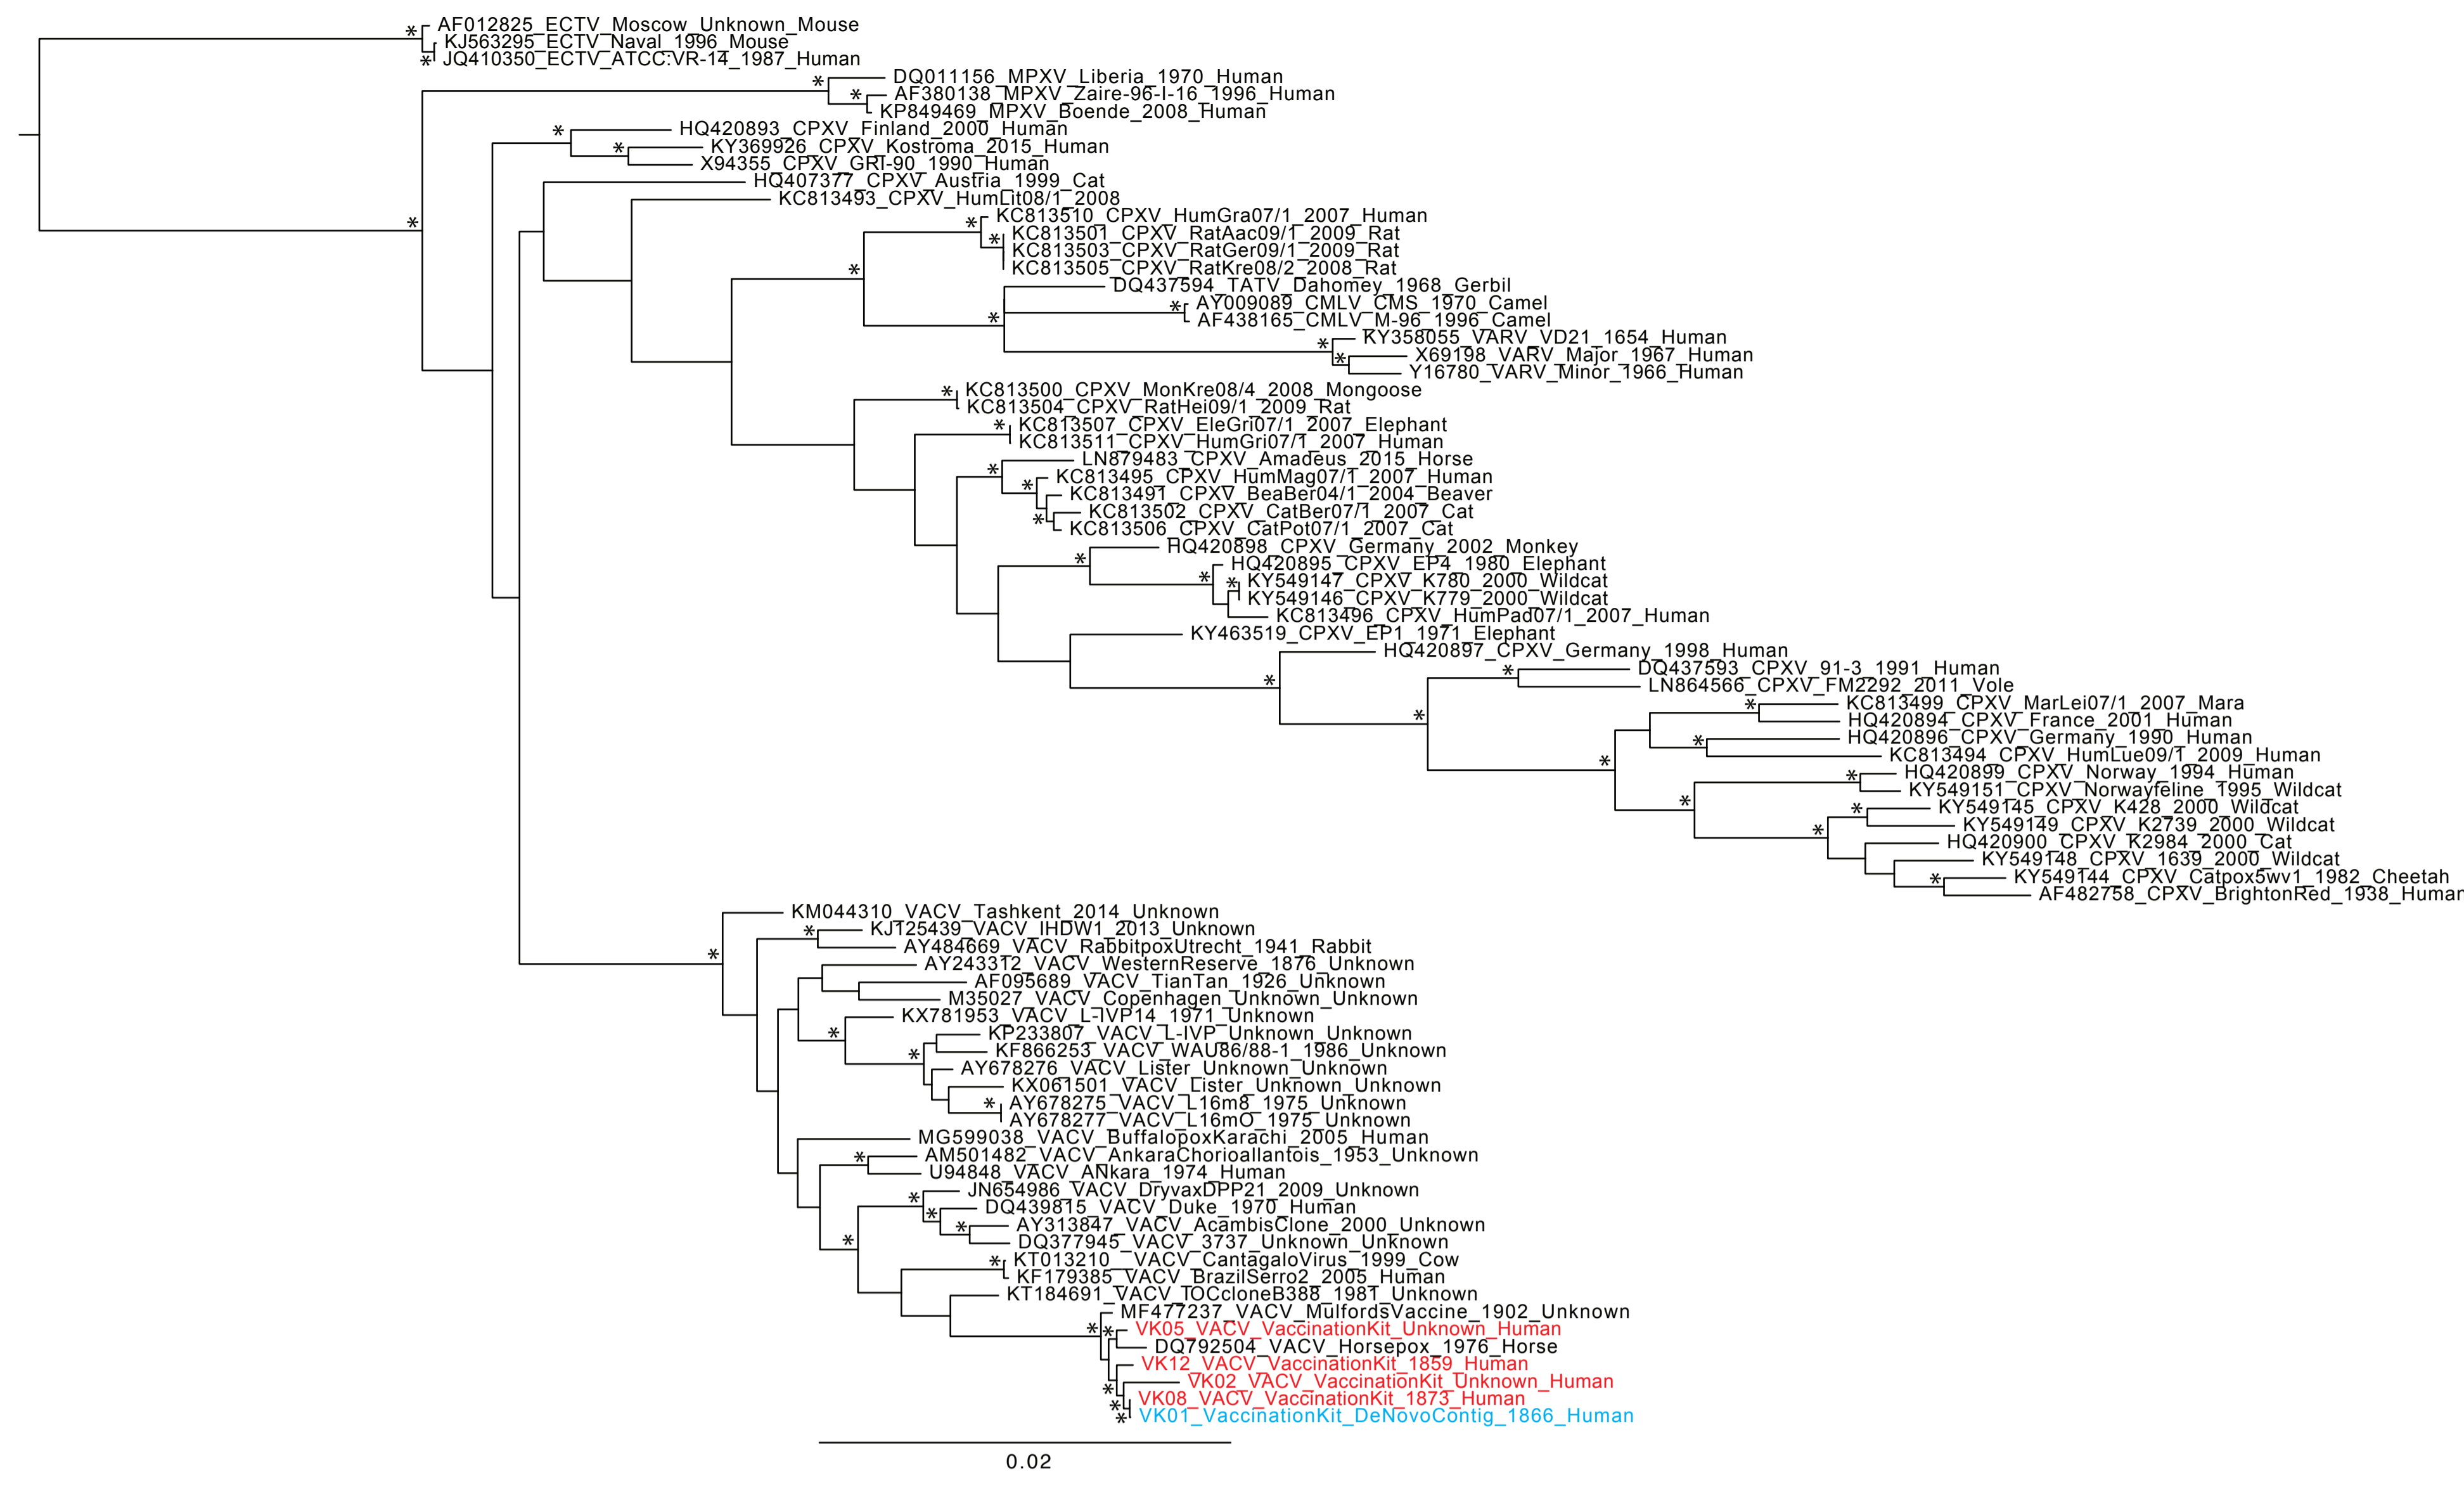**B**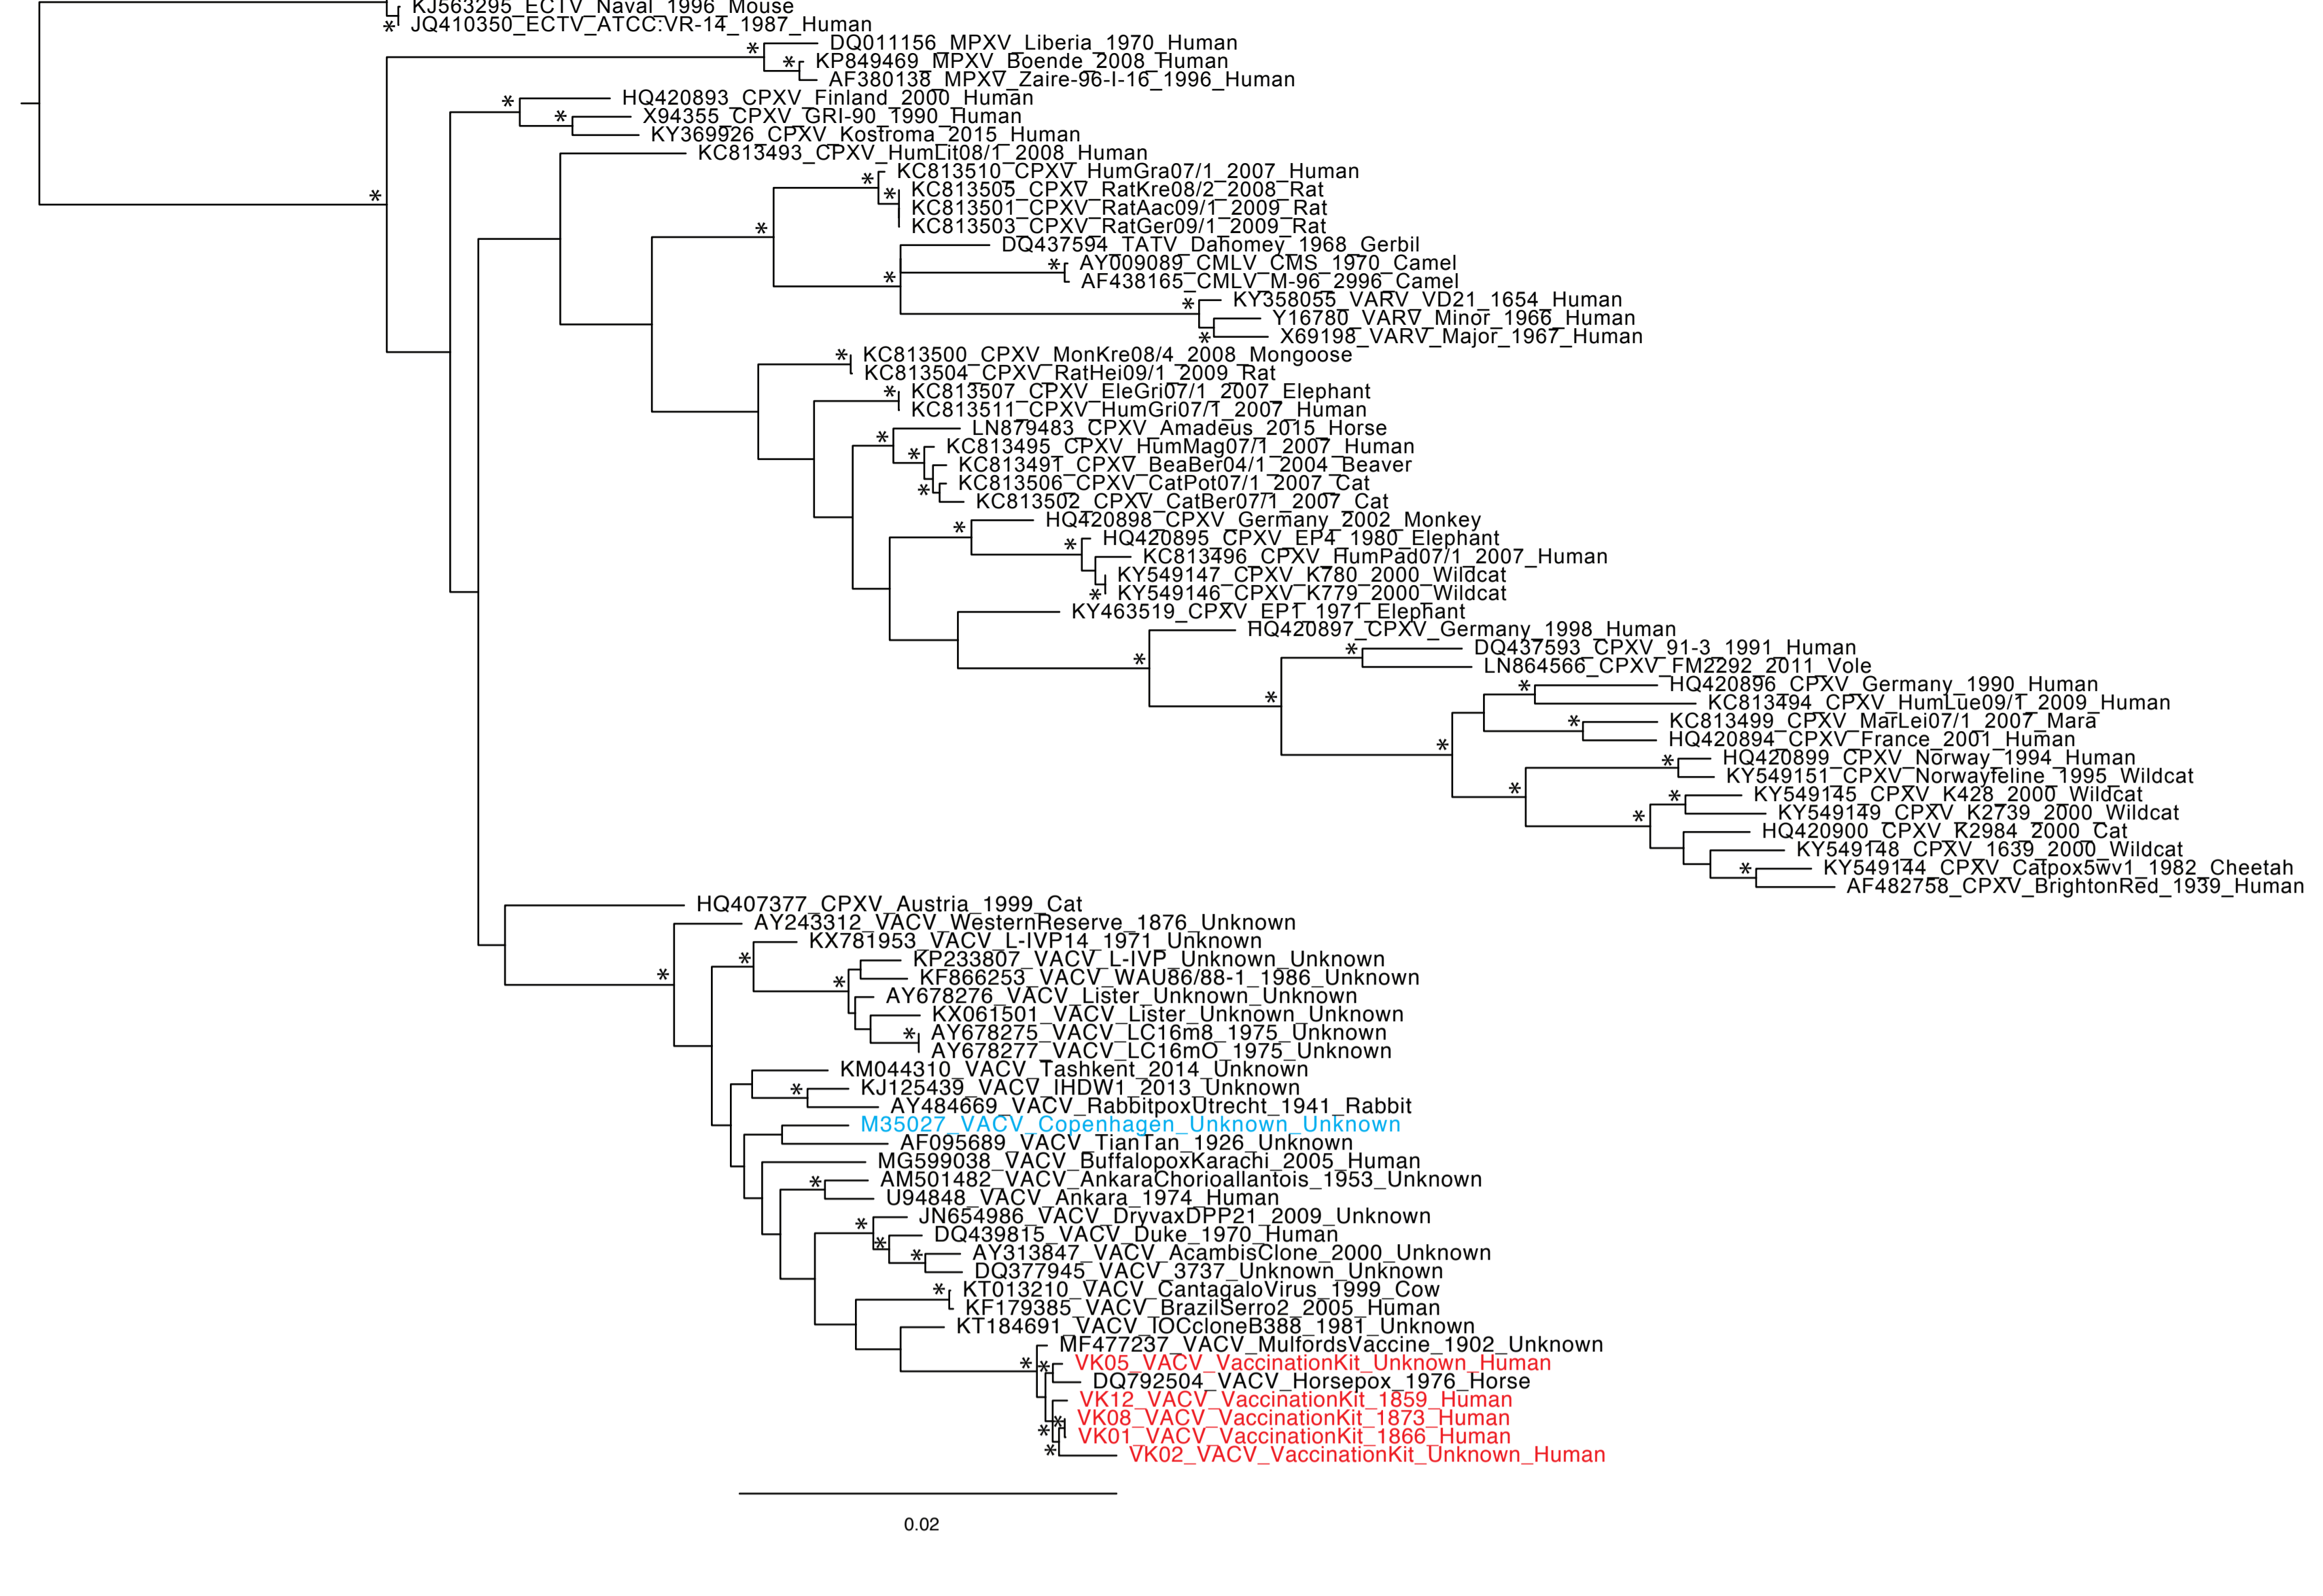**C**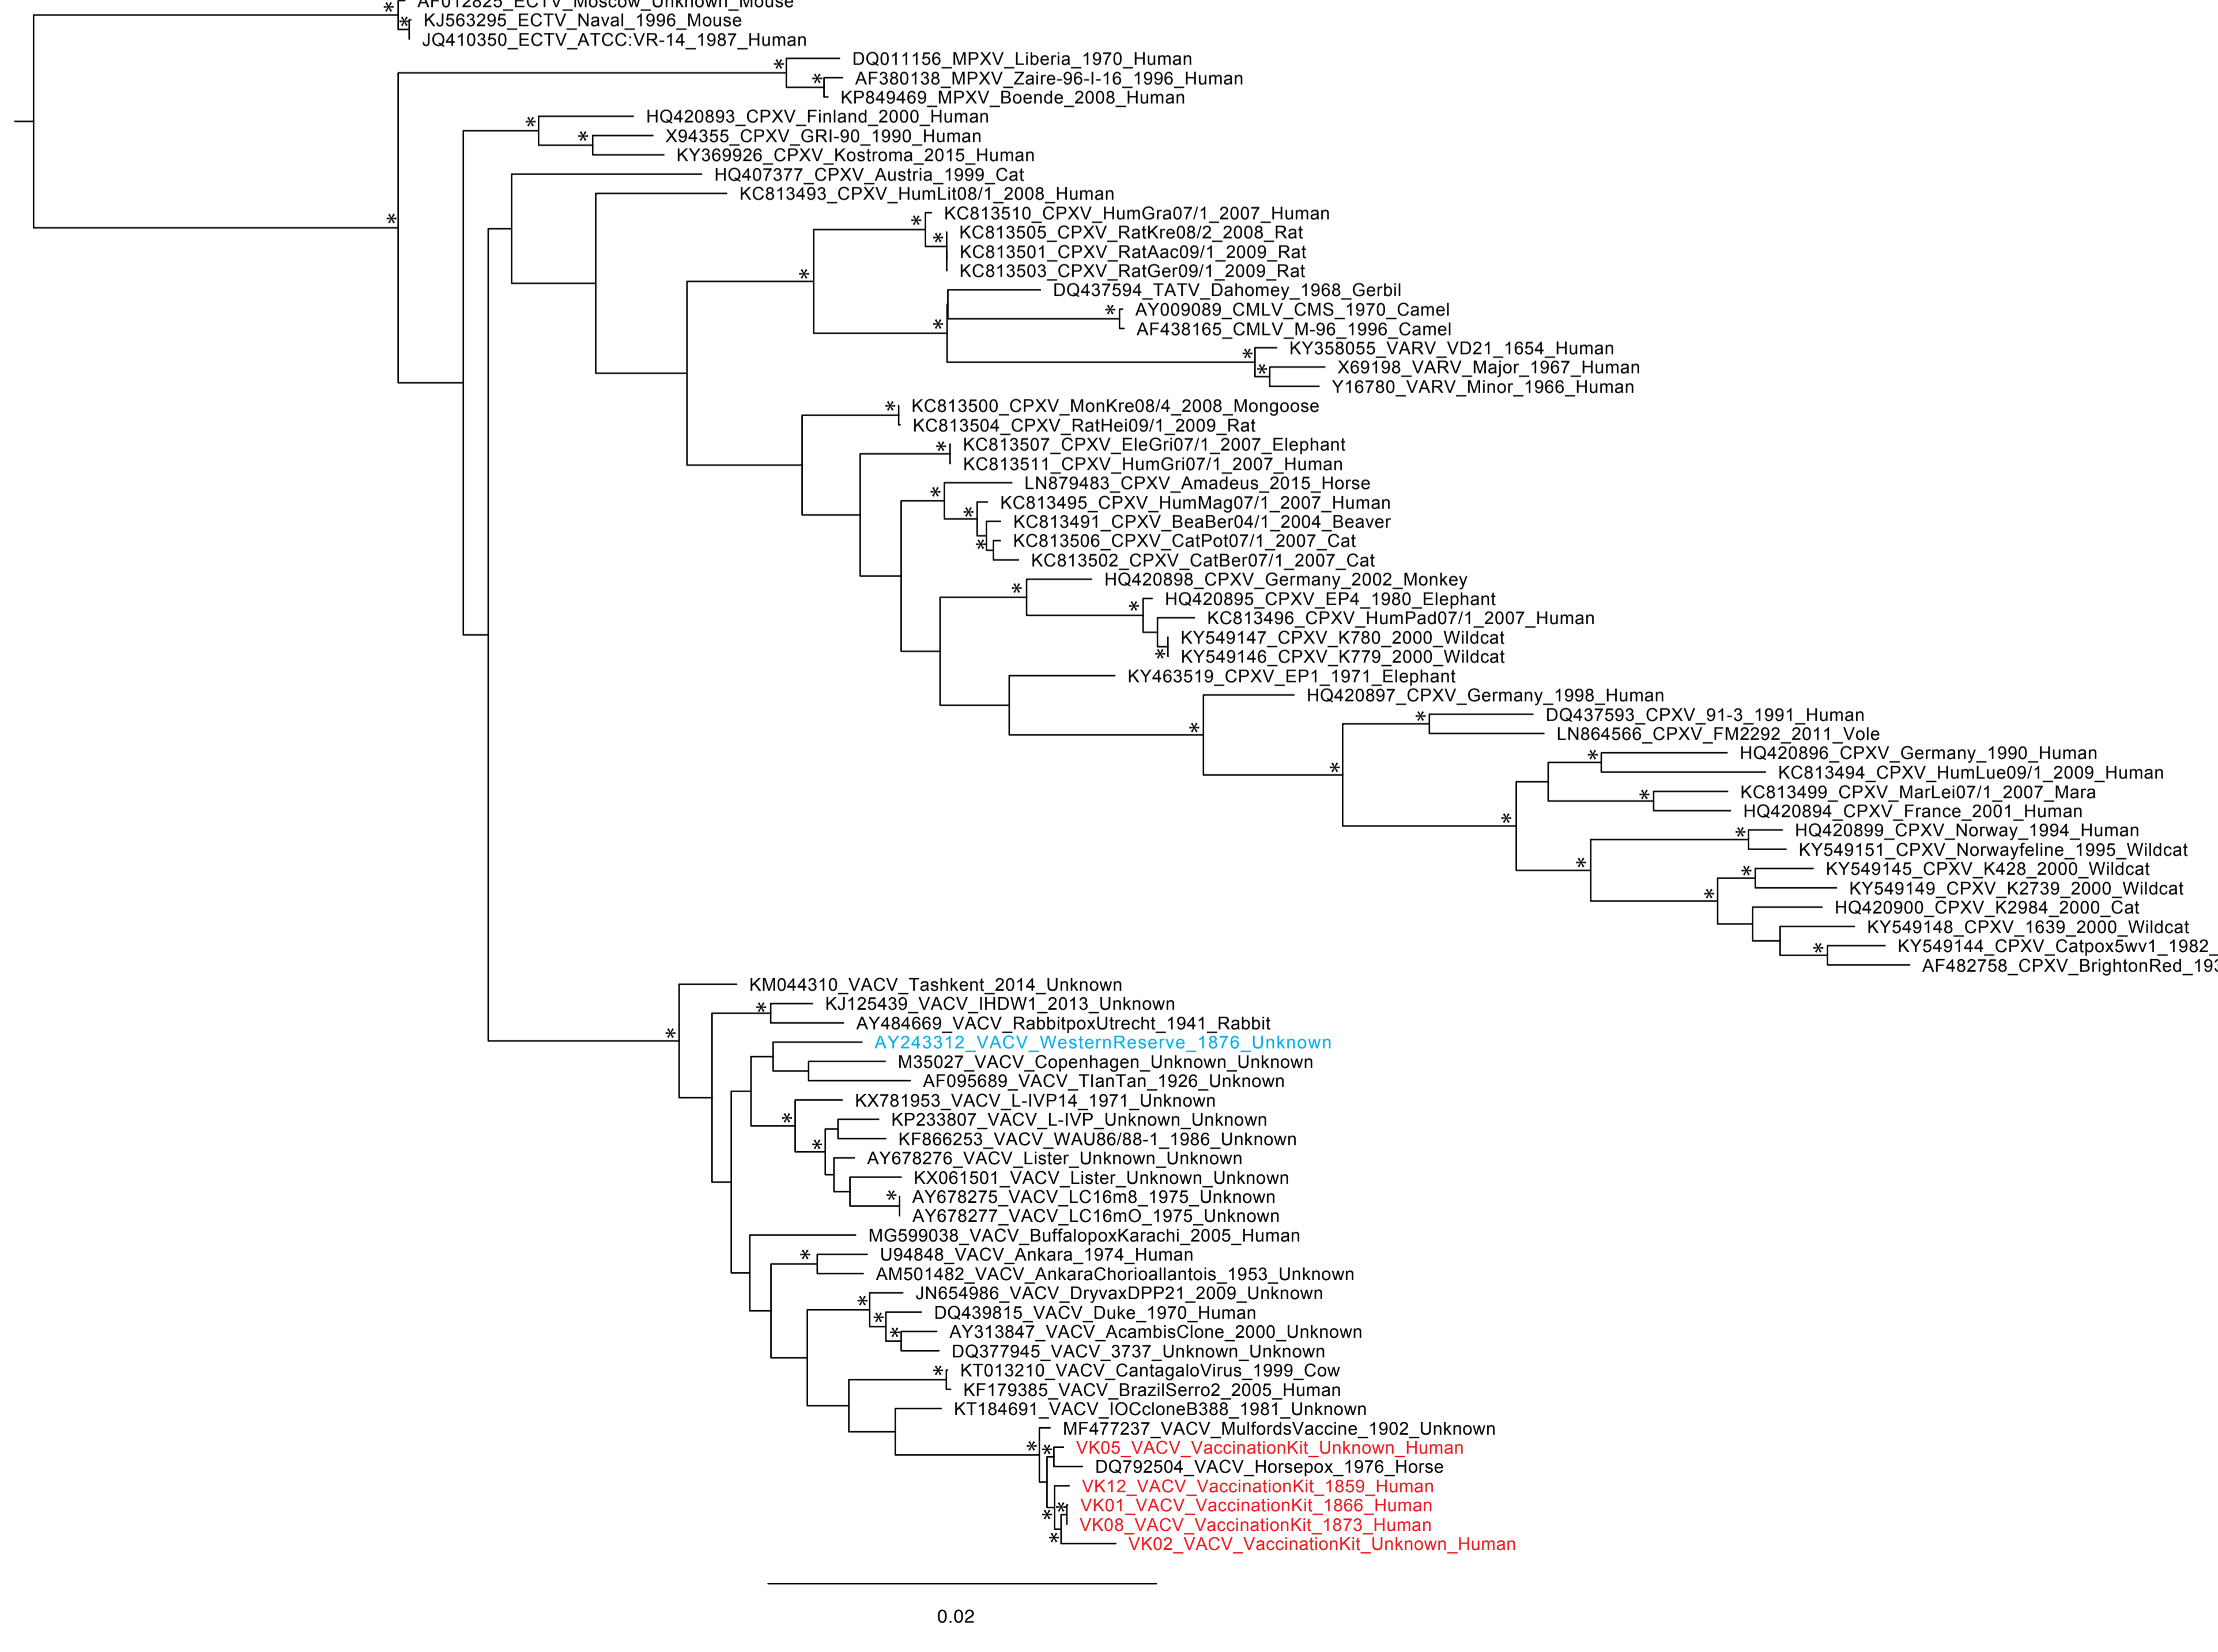**D**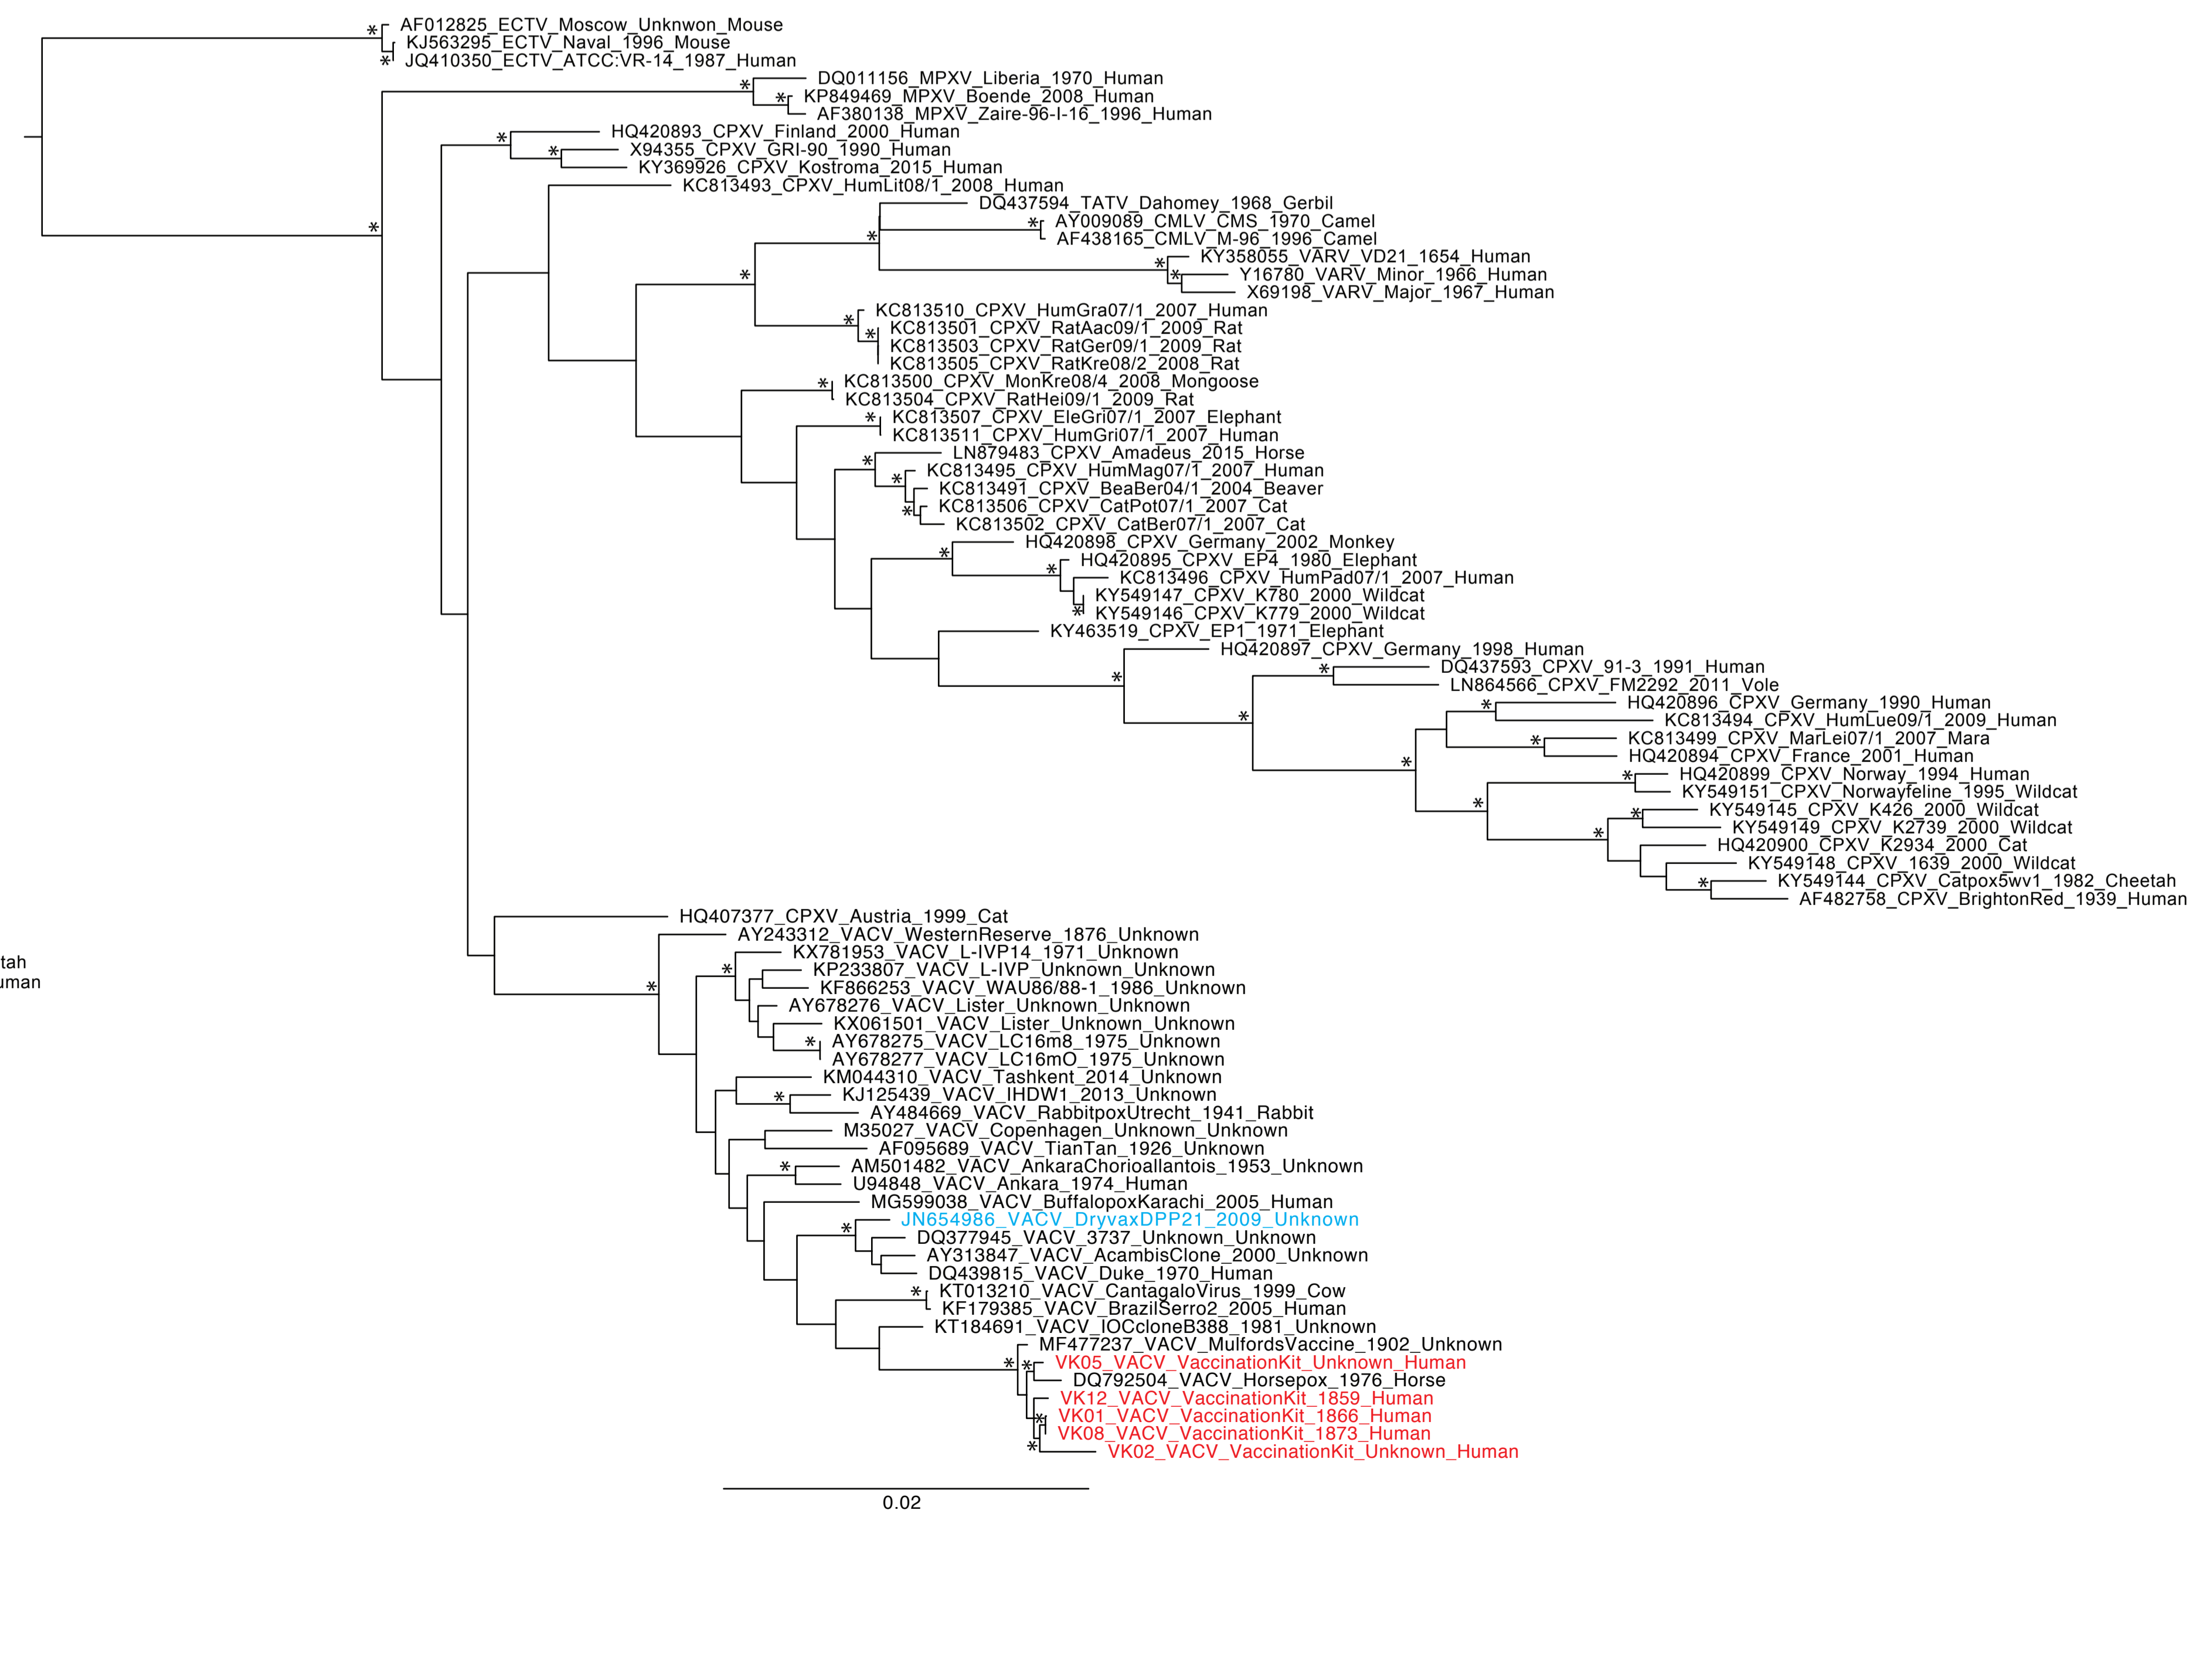

Supplement: 13059_2020_2079_MOESM6_ESM.pdf [file 13059_2020_2079_MOESM6_ESM.pdf]
