# Supplementary material for: The origins and genomic diversity of American Civil War Era smallpox vaccine strains
Source: PubMed Central journal article supplement (PMC7370420; doi:10.1186/s13059-020-02079-z), 2020-07-20

**A**

- Ectromelia virus
- Monkeypox
- Cowpox virus
- Taterapox/Camel pox
- Variola virus
- Vaccinia virus
- Ancient vaccine strains

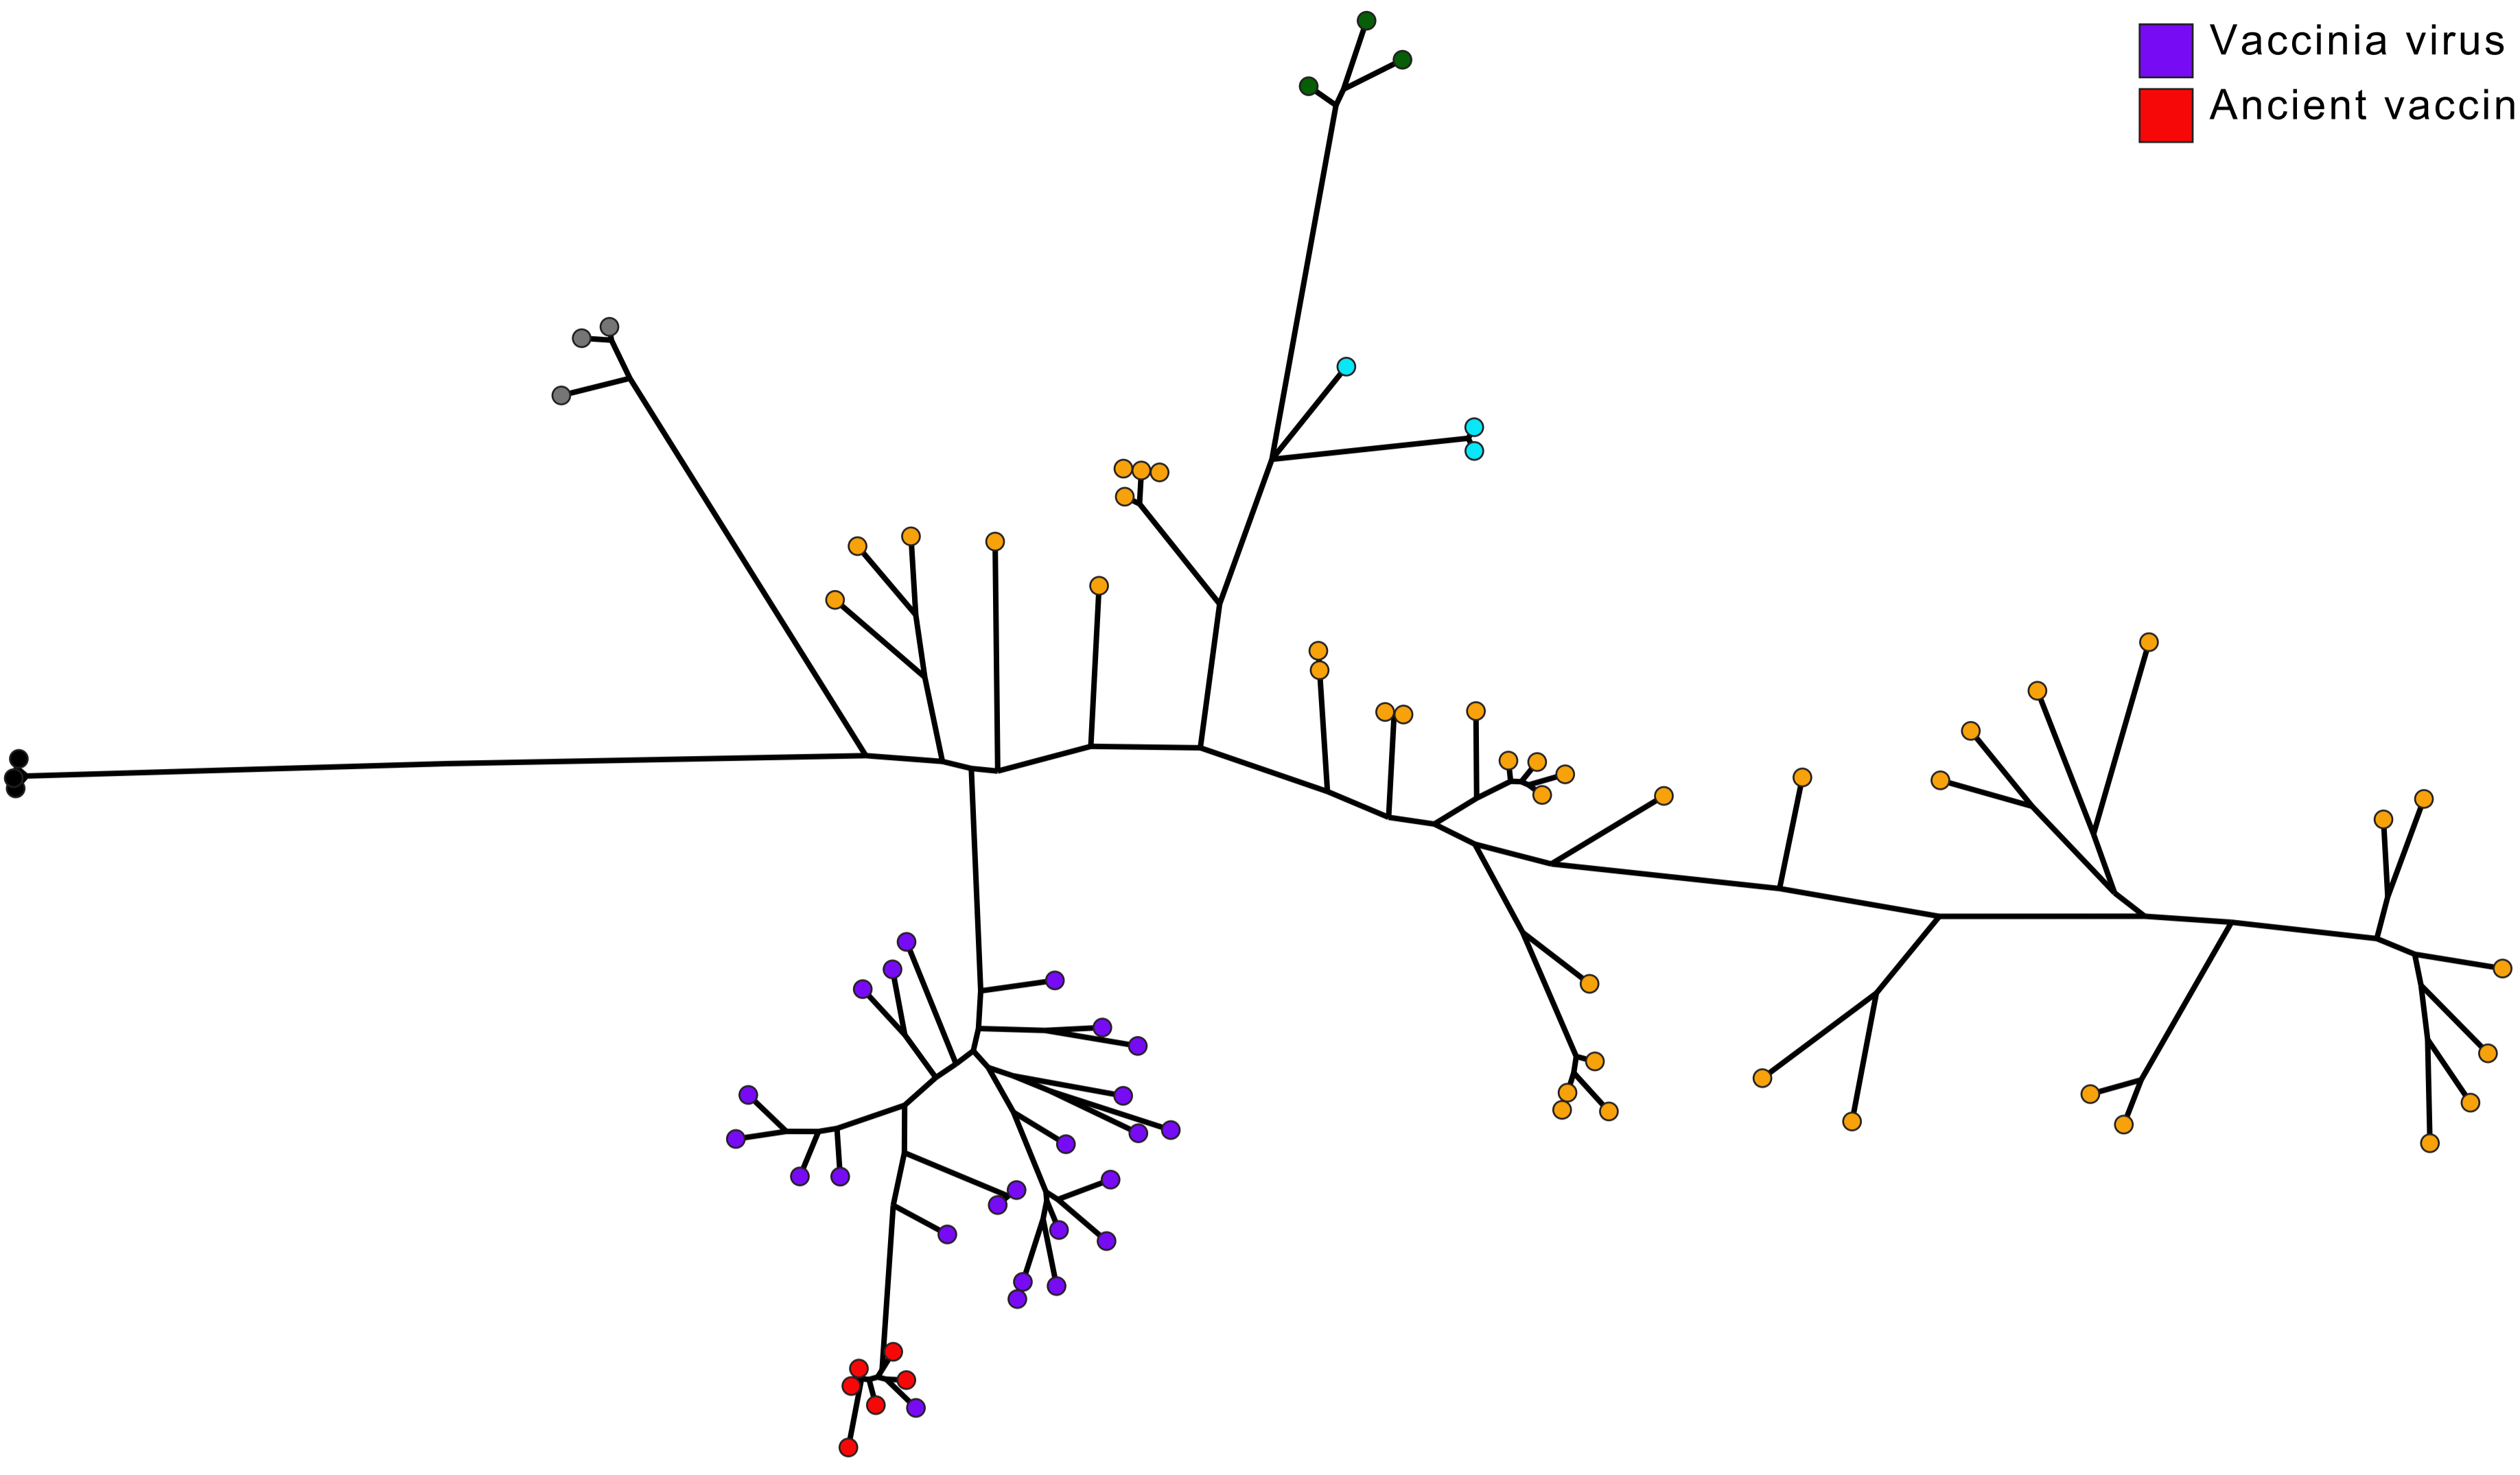**B**

- Austria
- Benin
- Brazil
- Canada
- China
- DRC
- Finland
- France
- Germany
- India
- Iran
- Kazakhstan
- Liberia
- Lithuania
- Mongolia
- Norway
- Pakistan
- Poland
- Russia
- Turkey
- UK
- USA
- Unknown

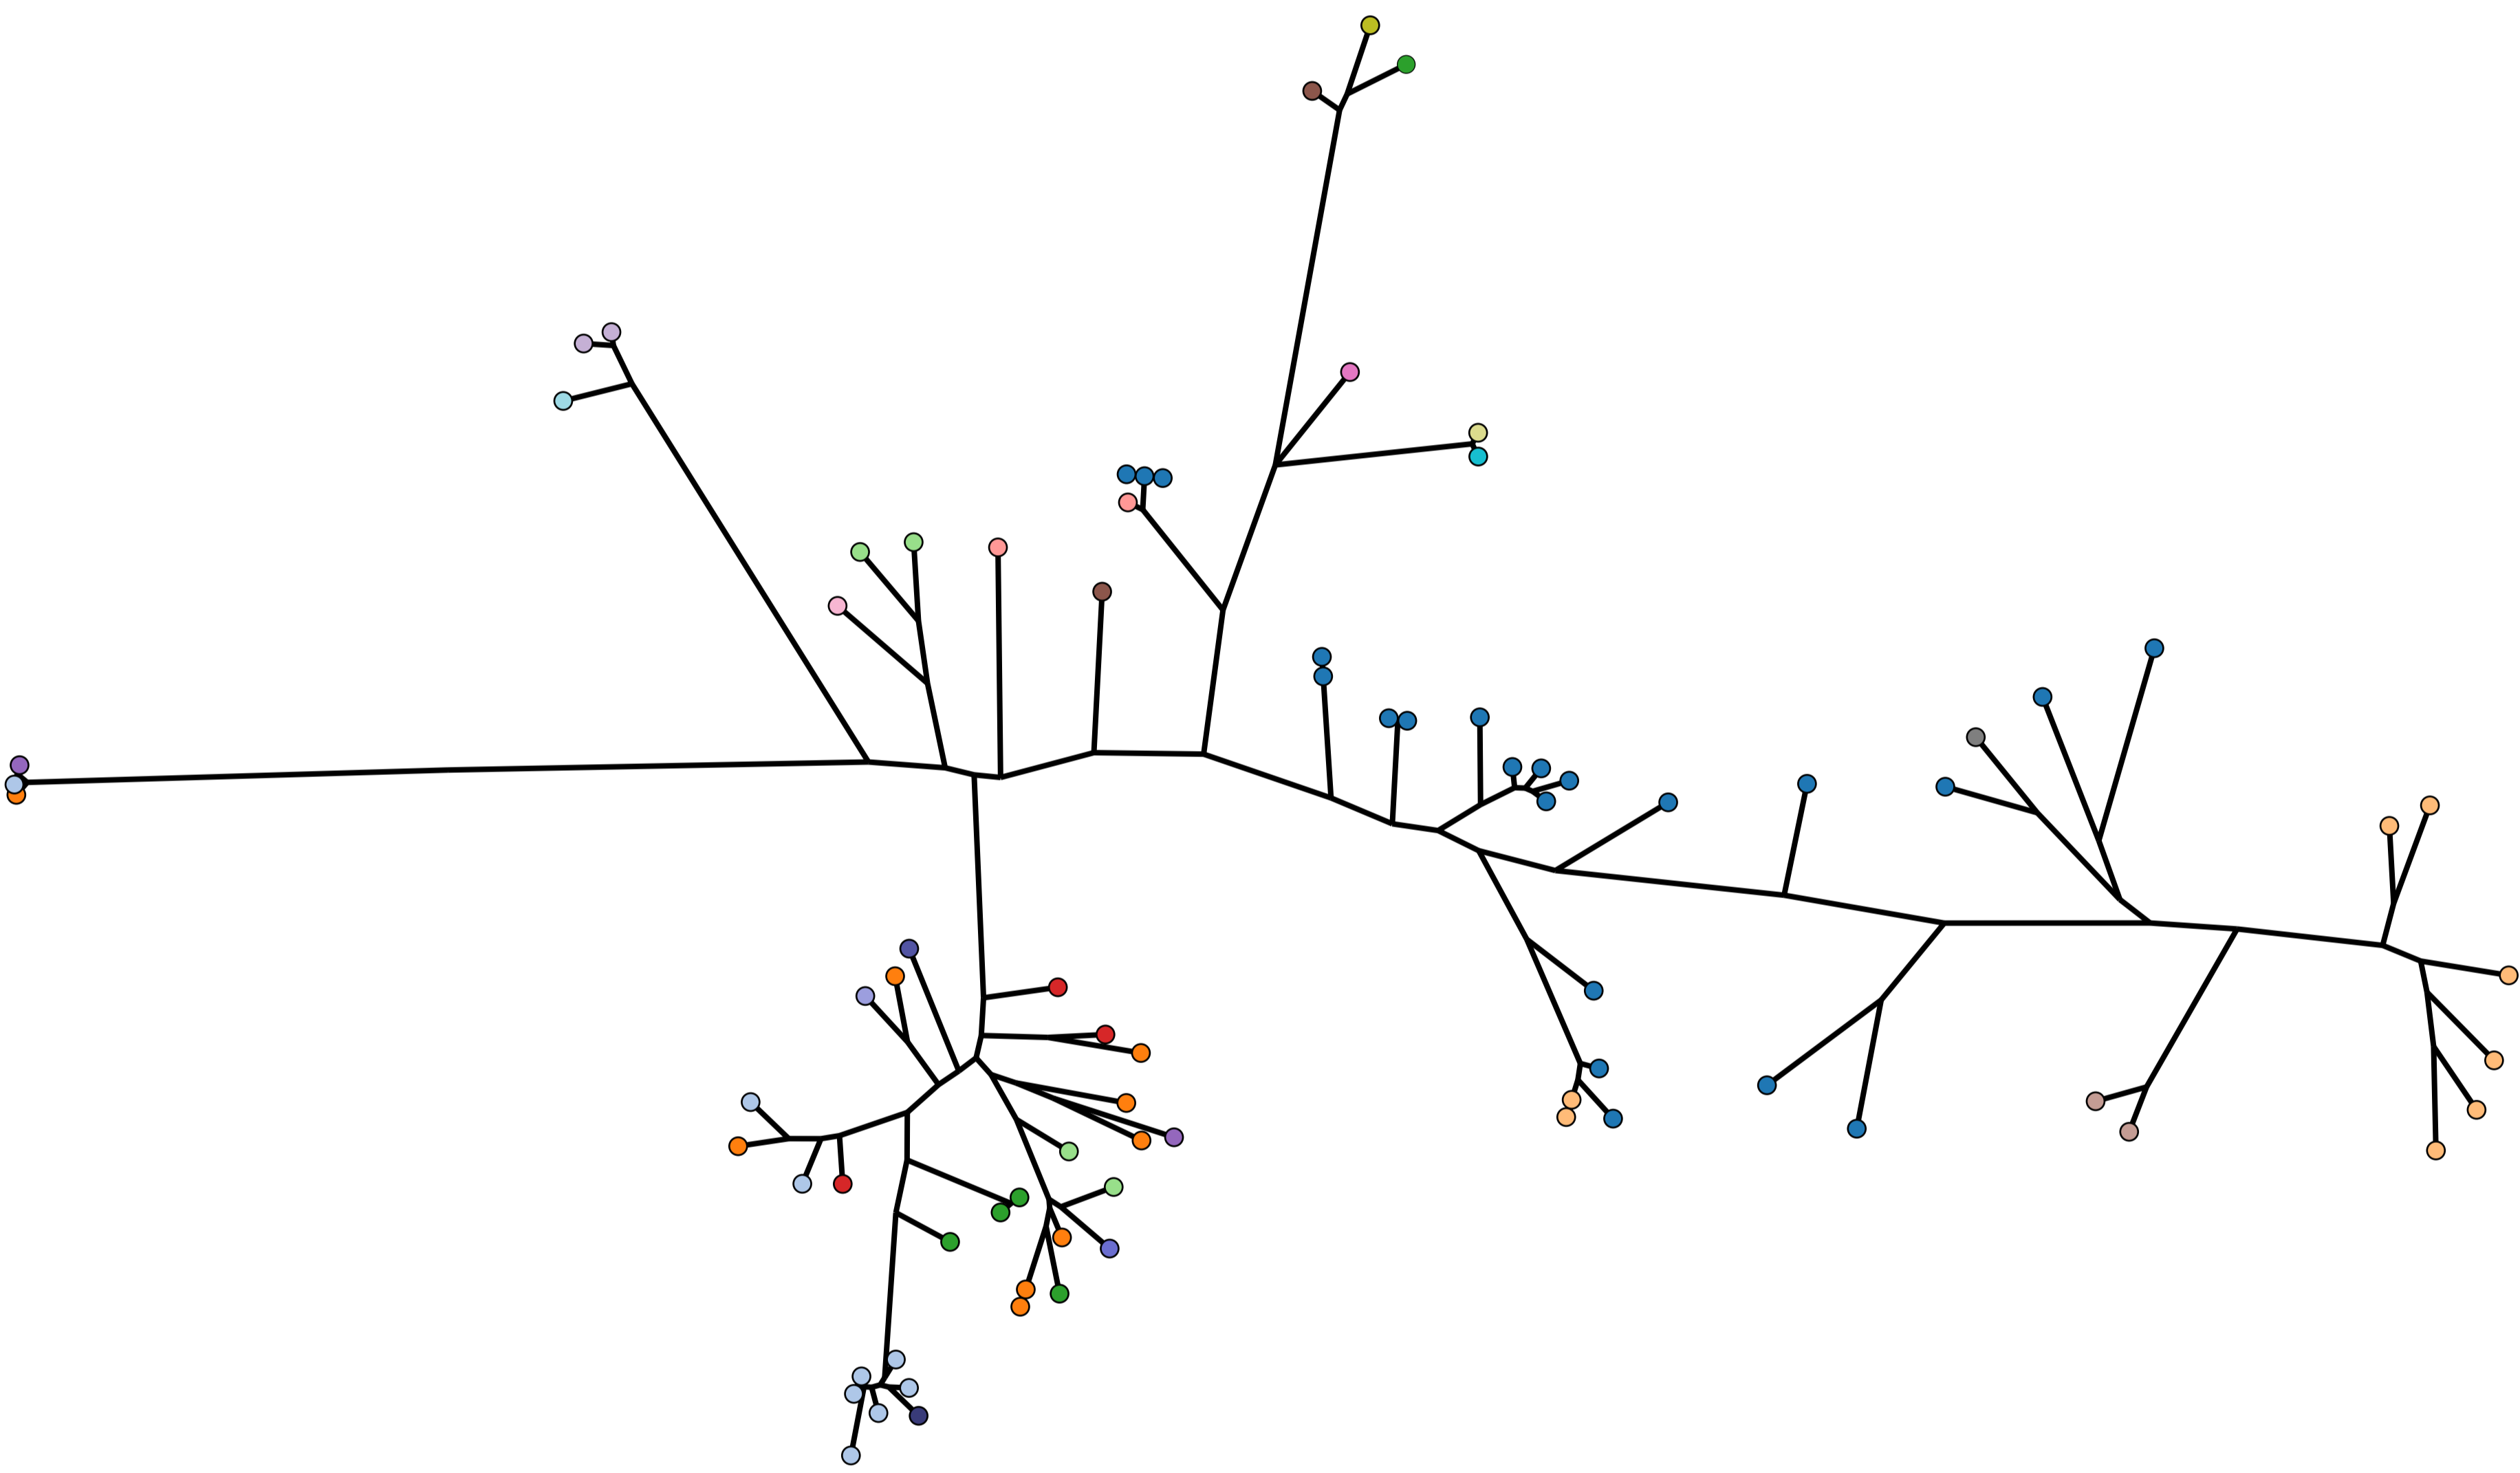**C**

- Beaver
- Camel
- Cat
- Cheetah
- Cow
- Elephant
- Horse
- Human
- Mara
- Mongoose
- Monkey
- Mouse
- Rabbit
- Rat
- Vole
- Wildcat
- Unknown

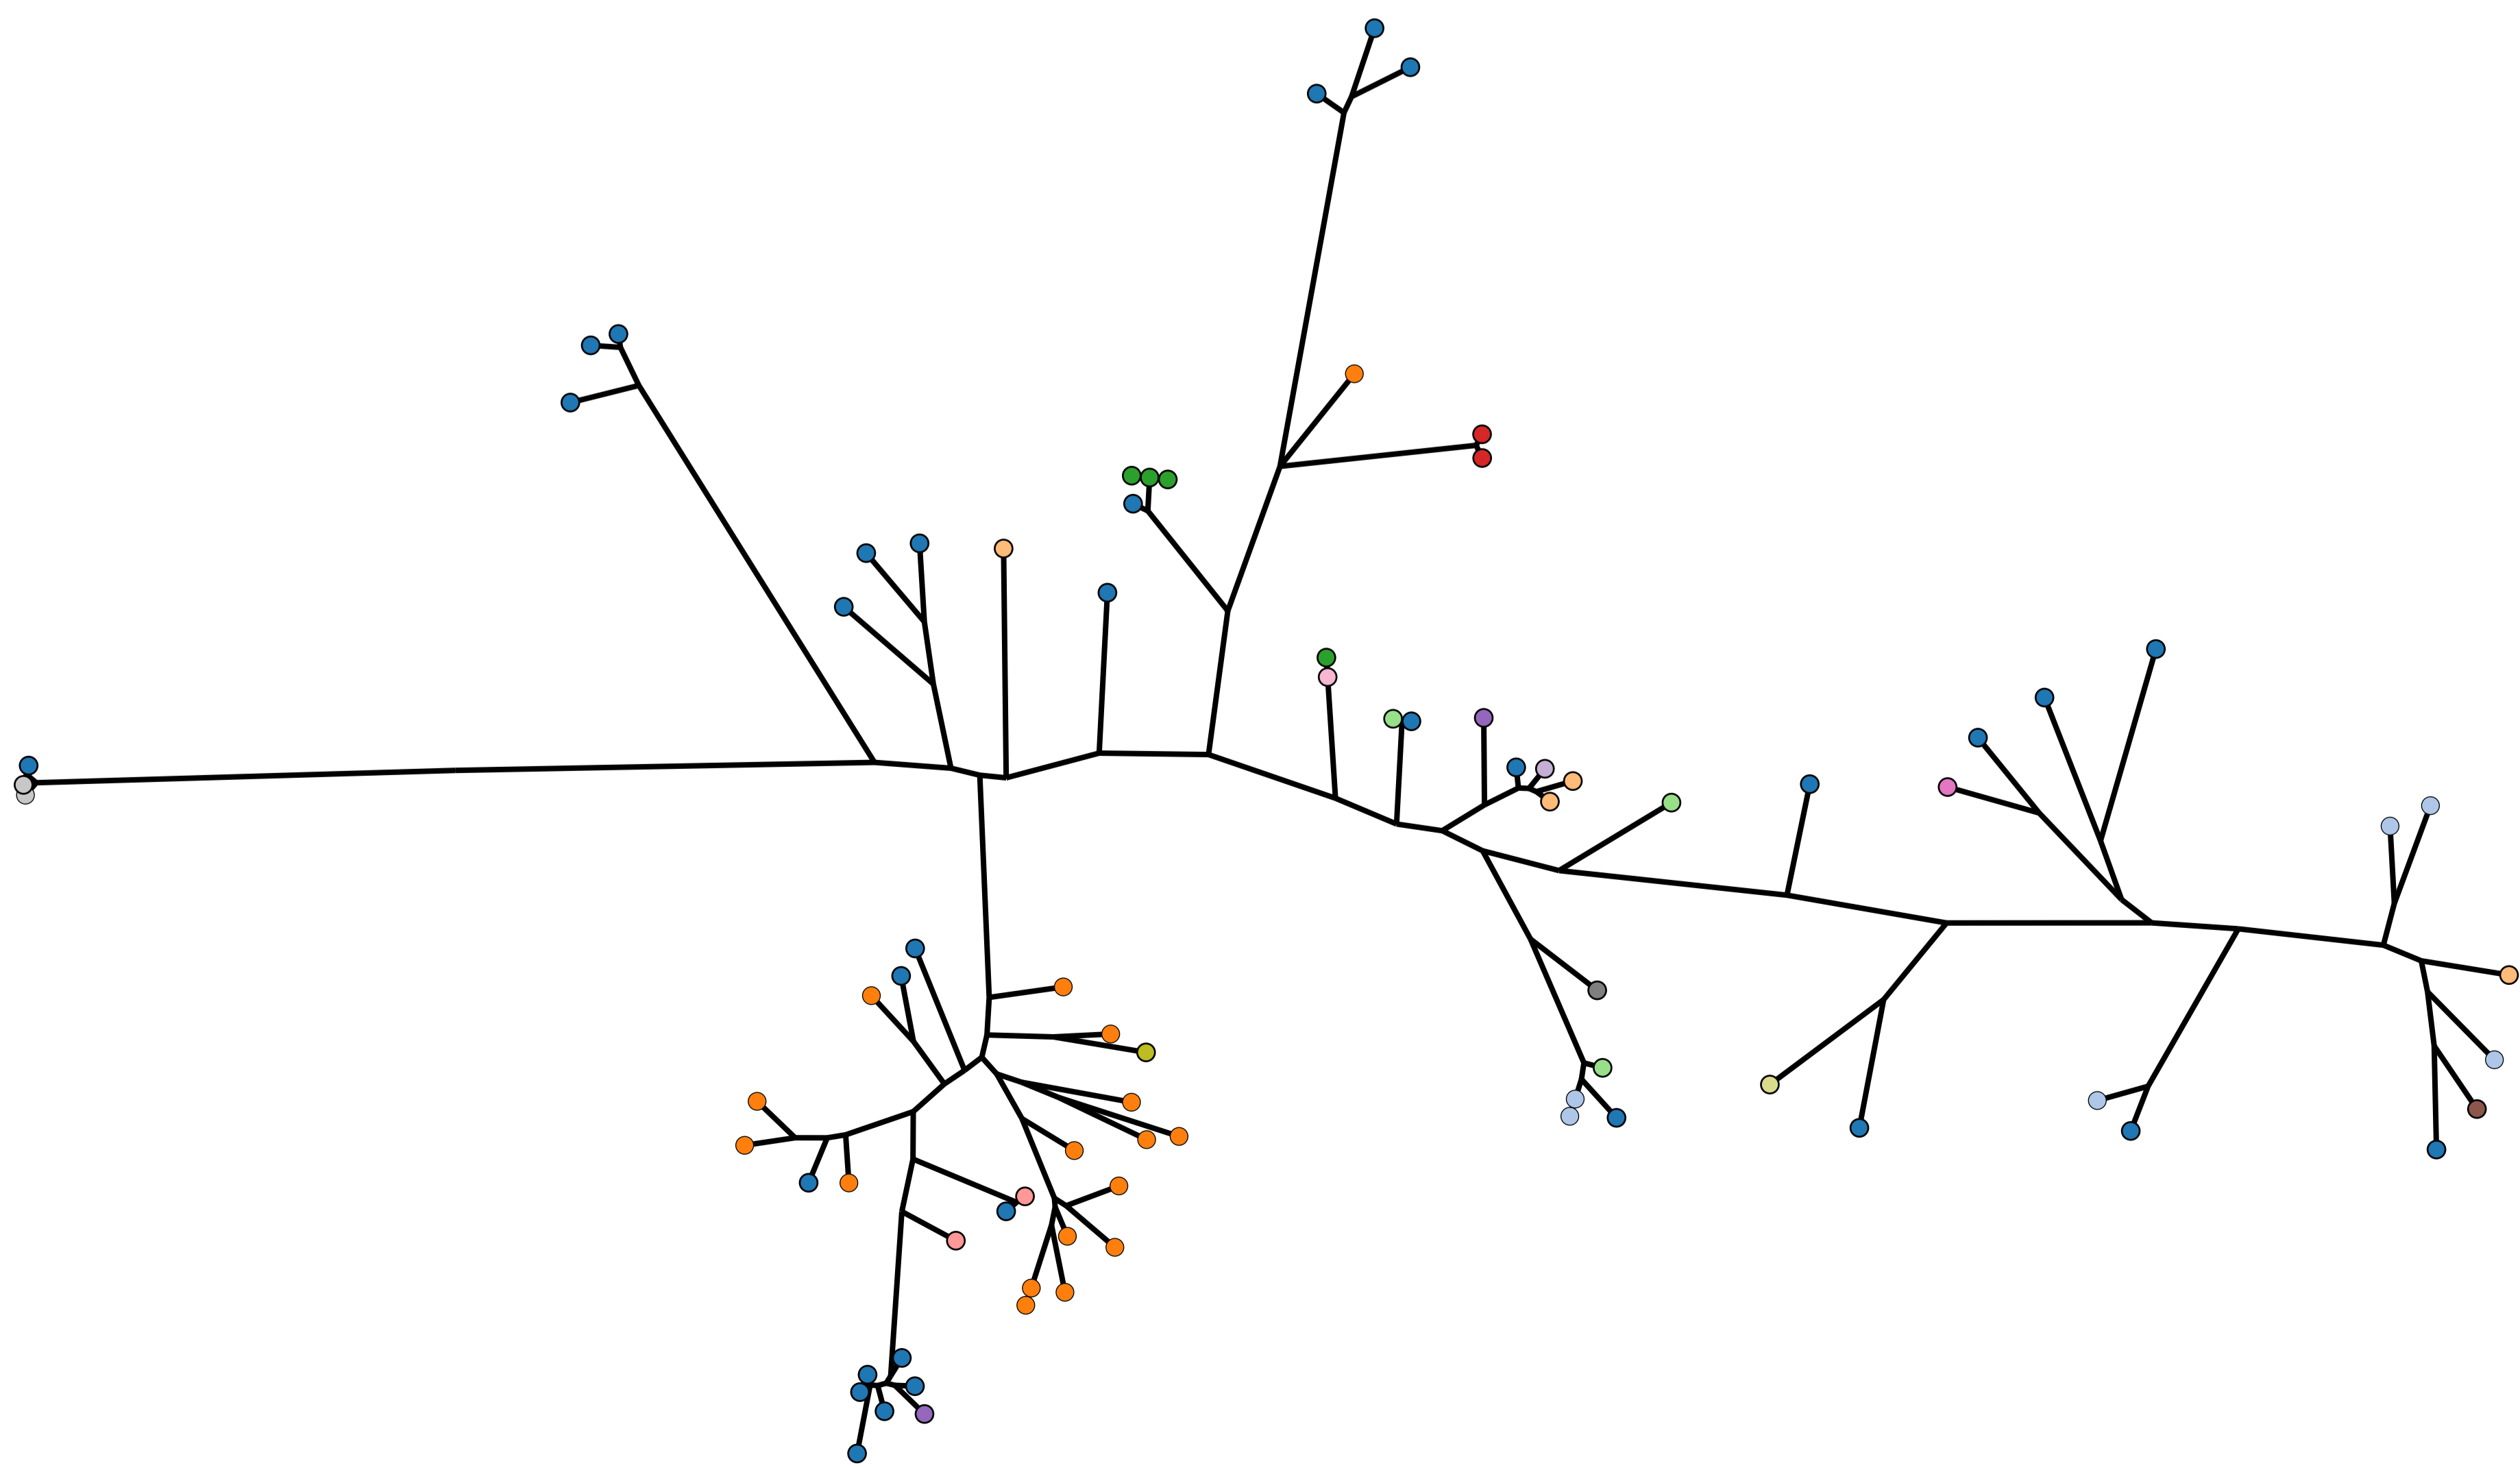

Supplement: 13059_2020_2079_MOESM7_ESM.pdf [file 13059_2020_2079_MOESM7_ESM.pdf]
