# Supplementary material for: The origins and genomic diversity of American Civil War Era smallpox vaccine strains
Source: PubMed Central journal article supplement (PMC7370420; doi:10.1186/s13059-020-02079-z), 2020-07-20

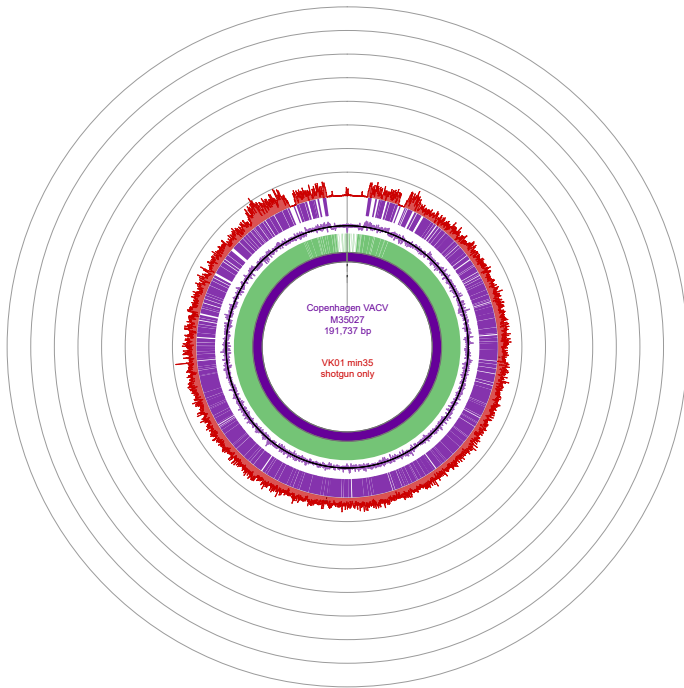

Apply map quality 30 filter  
32,833 reads removed

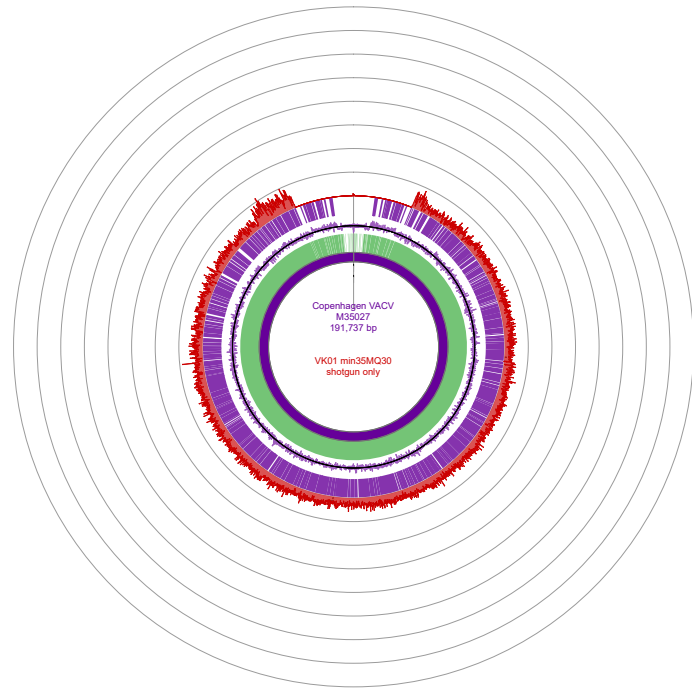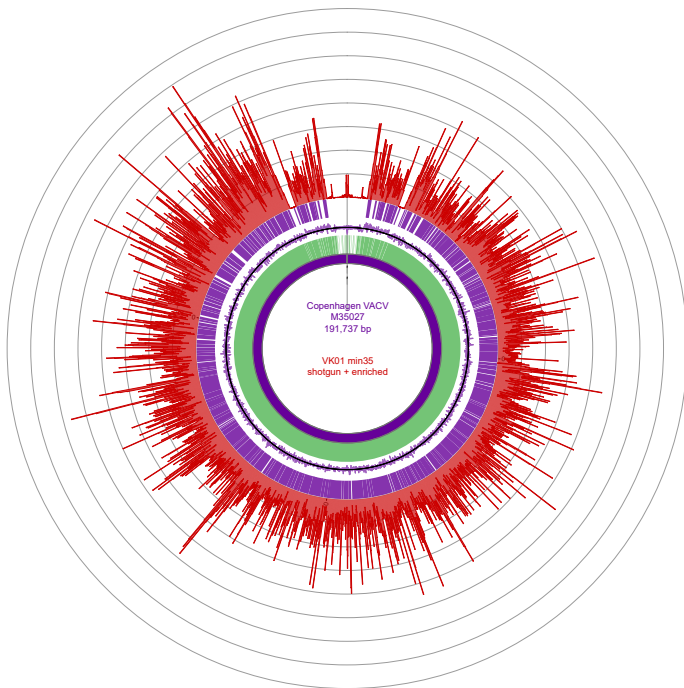

Apply map quality 30 filter  
97,767 reads removed

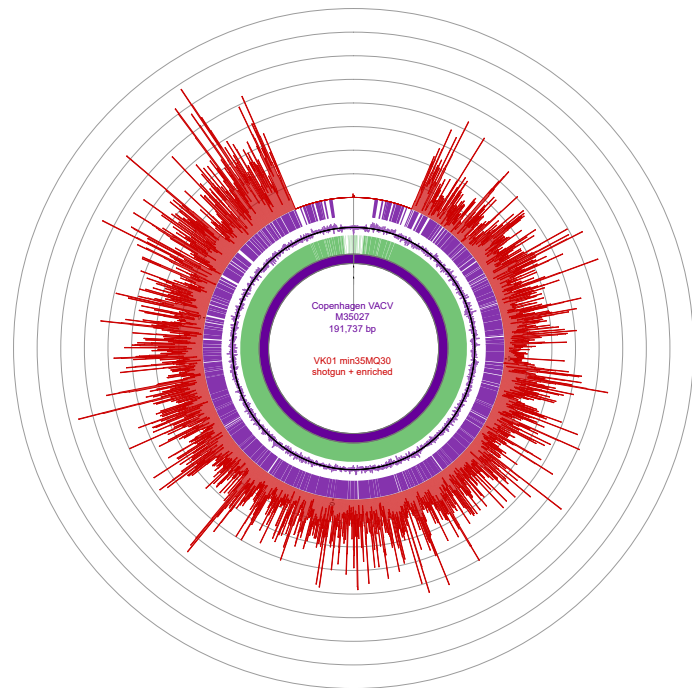

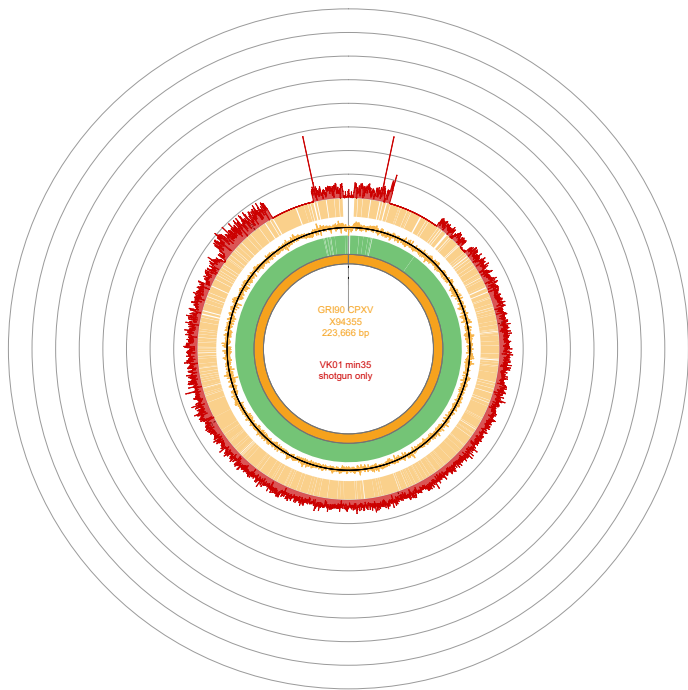

Apply map quality 30 filter  
48,264 reads removed

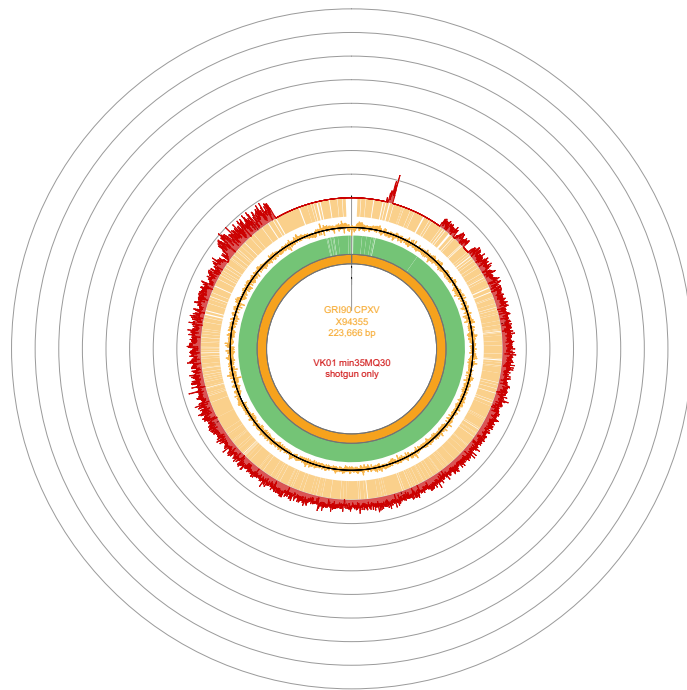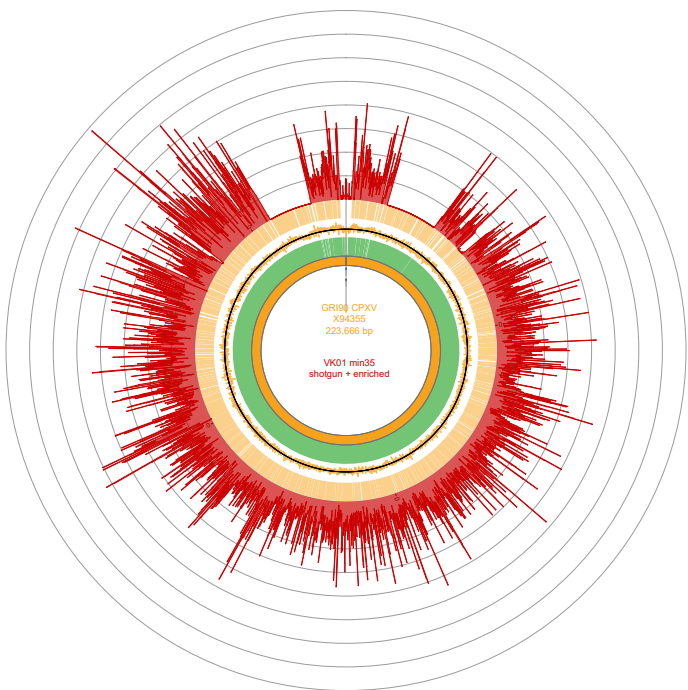

Apply map quality 30 filter  
147,017 reads removed

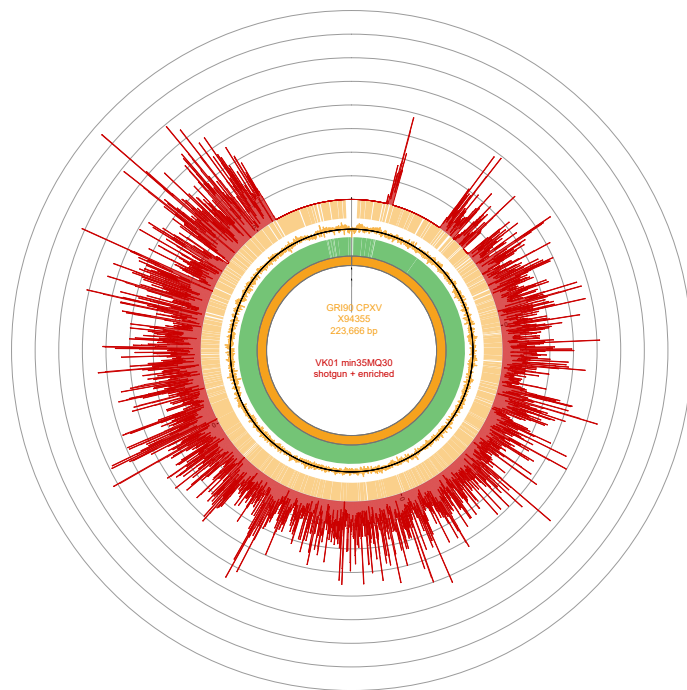

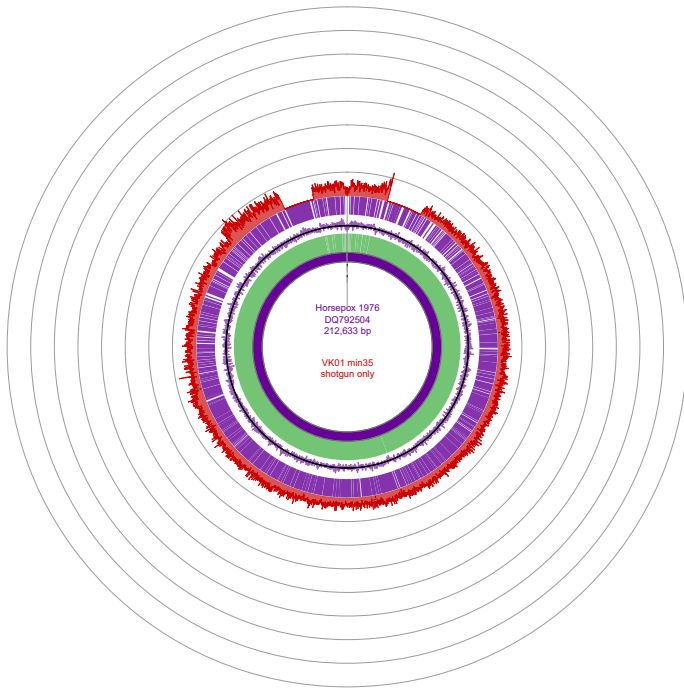

Apply map quality 30 filter  
35,271 reads removed

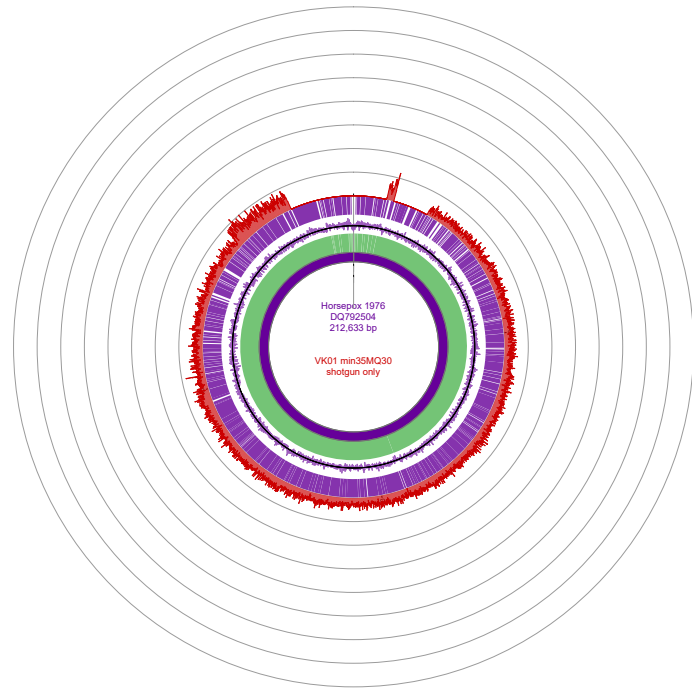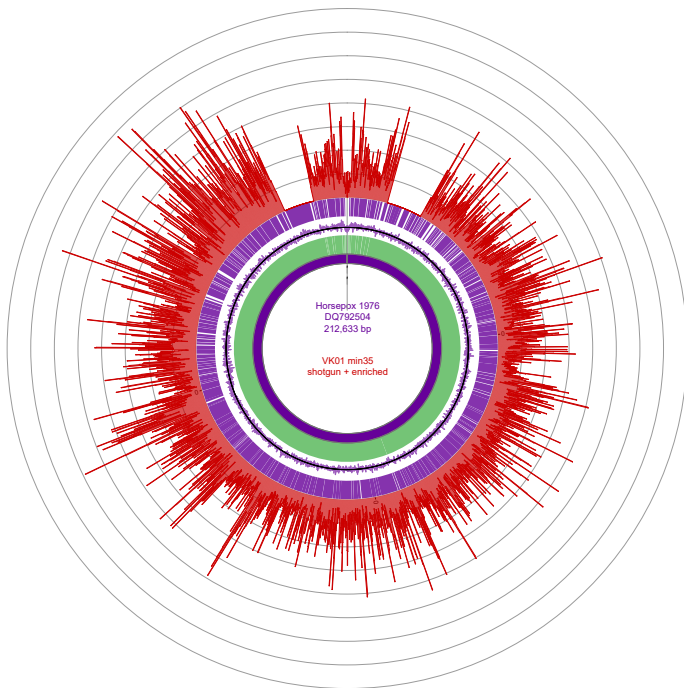

Apply map quality 30 filter  
102,693 reads removed

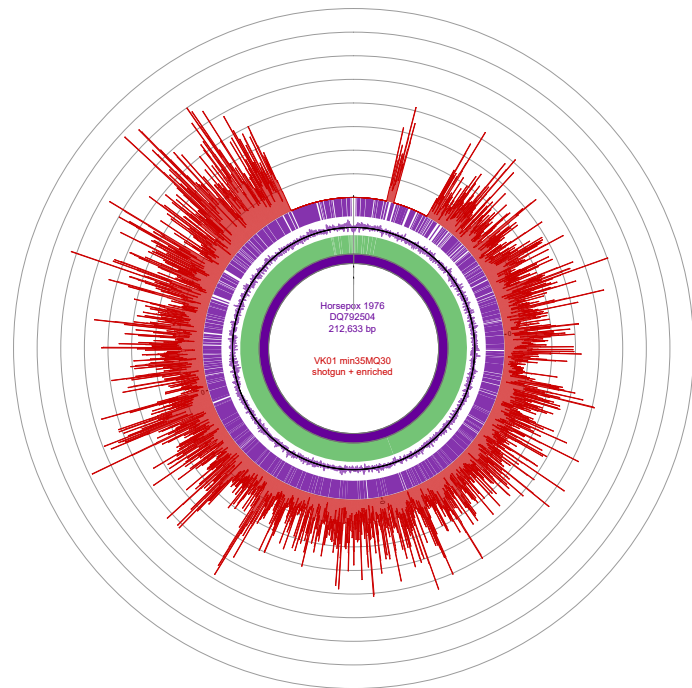

Supplement: 13059_2020_2079_MOESM15_ESM.pdf [file 13059_2020_2079_MOESM15_ESM.pdf]
