# Supplementary material for: The origins and genomic diversity of American Civil War Era smallpox vaccine strains
Source: PubMed Central journal article supplement (PMC7370420; doi:10.1186/s13059-020-02079-z), 2020-07-20
Supplement: 13059_2020_2079_MOESM16_ESM.pdf [file 13059_2020_2079_MOESM16_ESM.pdf]

- Ectromelia virus
- Monkeypox virus
- Cowpox virus
- Taterapox/Camelpox virus
- Variola virus
- Vaccinia virus
- Ancient vaccine strains

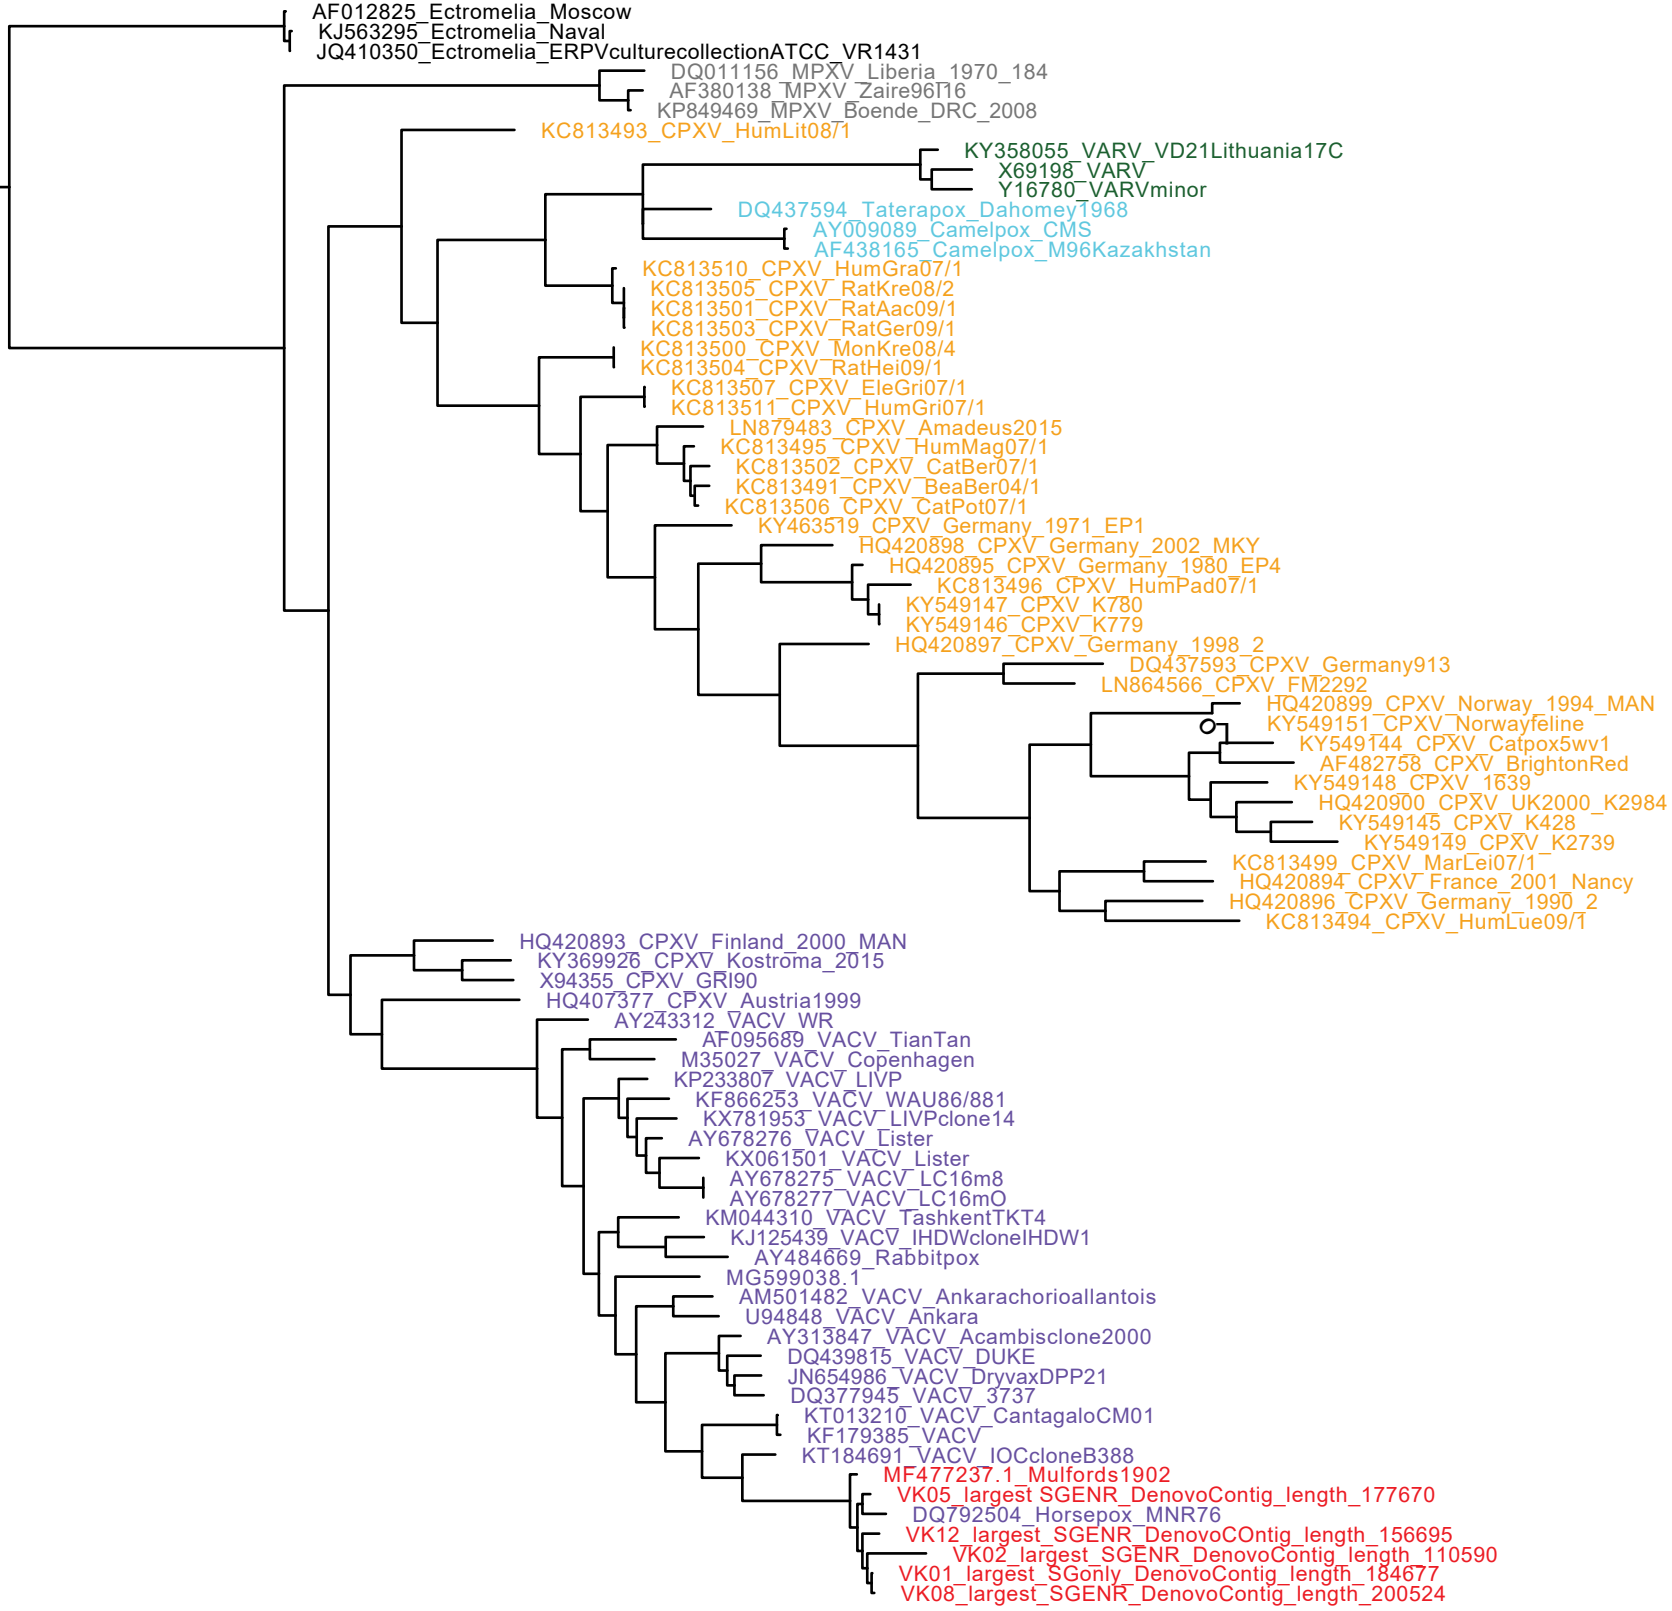

0.01
